# Supplementary material for: Novel Effective Fluorinated Benzothiophene-Indole Hybrid Antibacterials against S. aureus and MRSA Strains
Source: MDPI journal article supplement (doi:10.3390/ph15091138), 2022-09-13
Supplement: s1 [file s1]

# Supporting Information

*Communication*

## **Novel Effective Fluorinated Benzothiophene-Indole Hybrid Antibacterials against *S. aureus* and MRSA Strains**

**Marius Seethaler <sup>1</sup>, Tobias Hertlein <sup>2</sup>, Elisa Hopke <sup>2</sup>, Paul Köhling <sup>2</sup>, Knut Ohlsen <sup>2</sup>,  
Michael Lalk <sup>3</sup> and Andreas Hilgeroth <sup>1,\*</sup>**

<sup>1</sup> Institute of Pharmacy, Martin Luther University Halle-Wittenberg, 06120 Halle, Germany

<sup>2</sup> Institute of Molecular Infection Biology, Julius Maximilians University Würzburg, 97080 Würzburg, Germany

<sup>3</sup> Institute of Biochemistry, Ernst Moritz Arndt University Greifswald, 17489 Greifswald, Germany

\* Correspondence: andreas.hilgeroth@pharmazie.uni-halle.de; Tel.: +49-345-55-25168

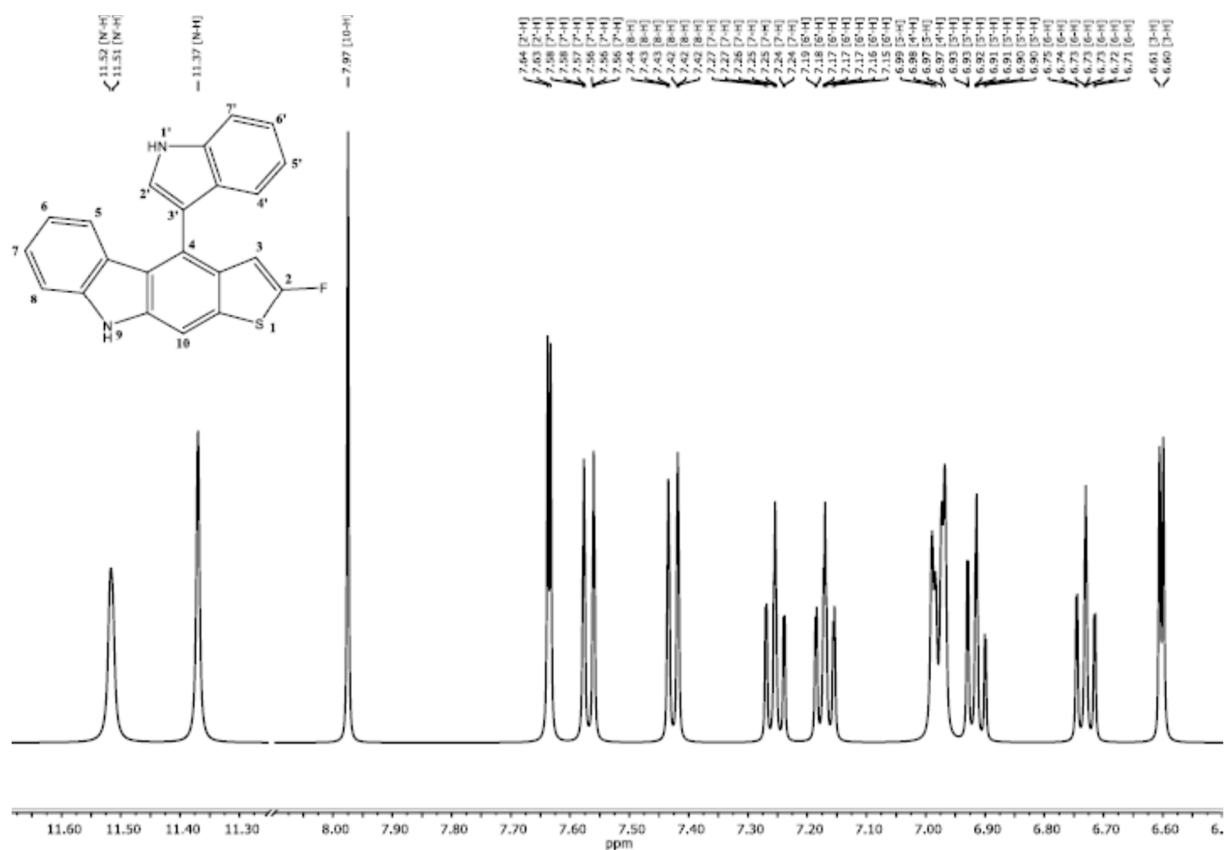

<sup>1</sup>H NMR spectrum of compound **3a**

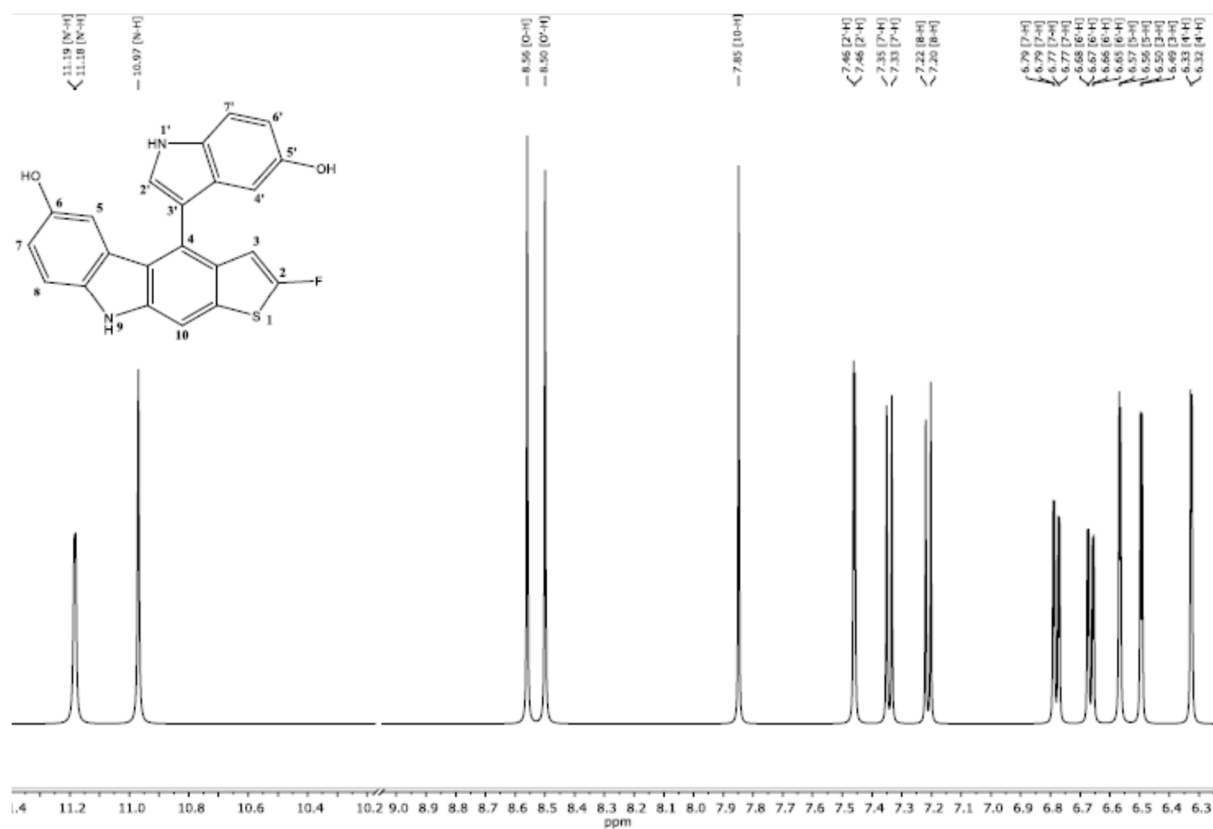

<sup>1</sup>H NMR spectrum of compound **3b**

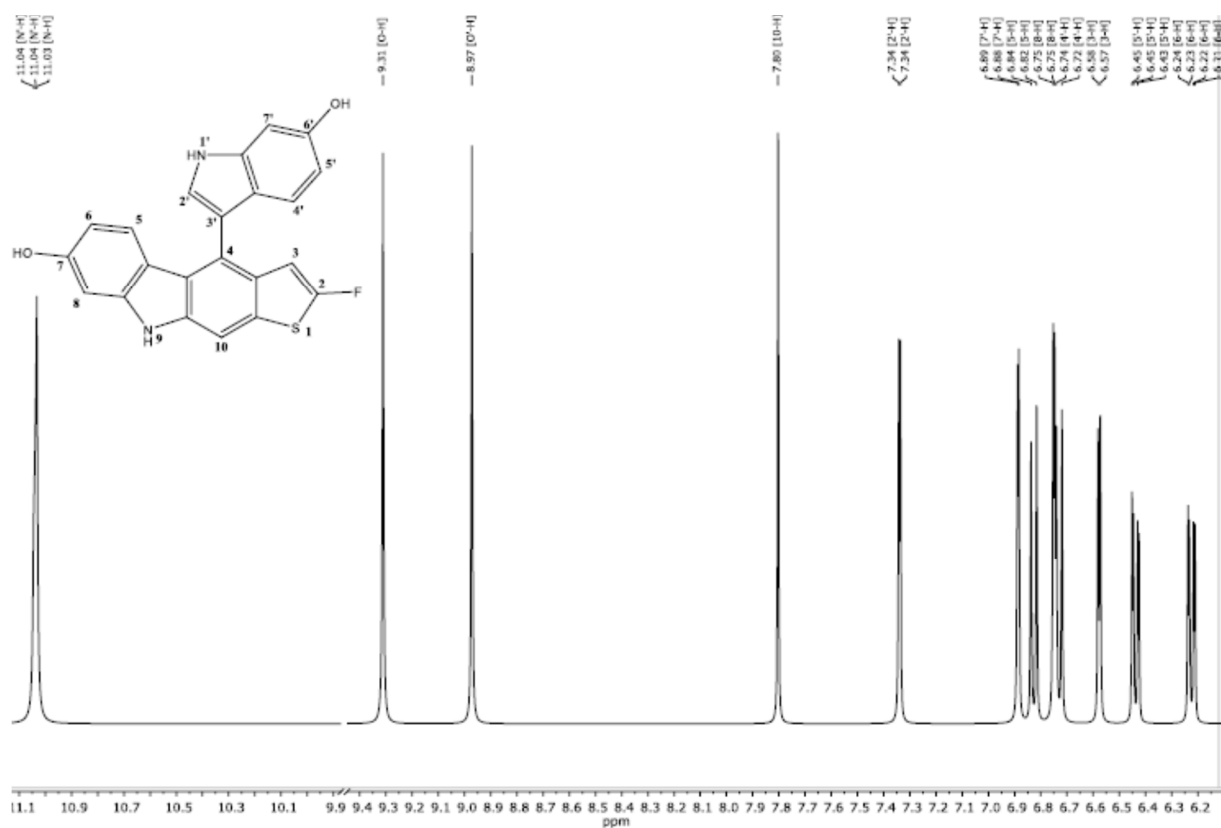

<sup>1</sup>H NMR spectrum of **3c**

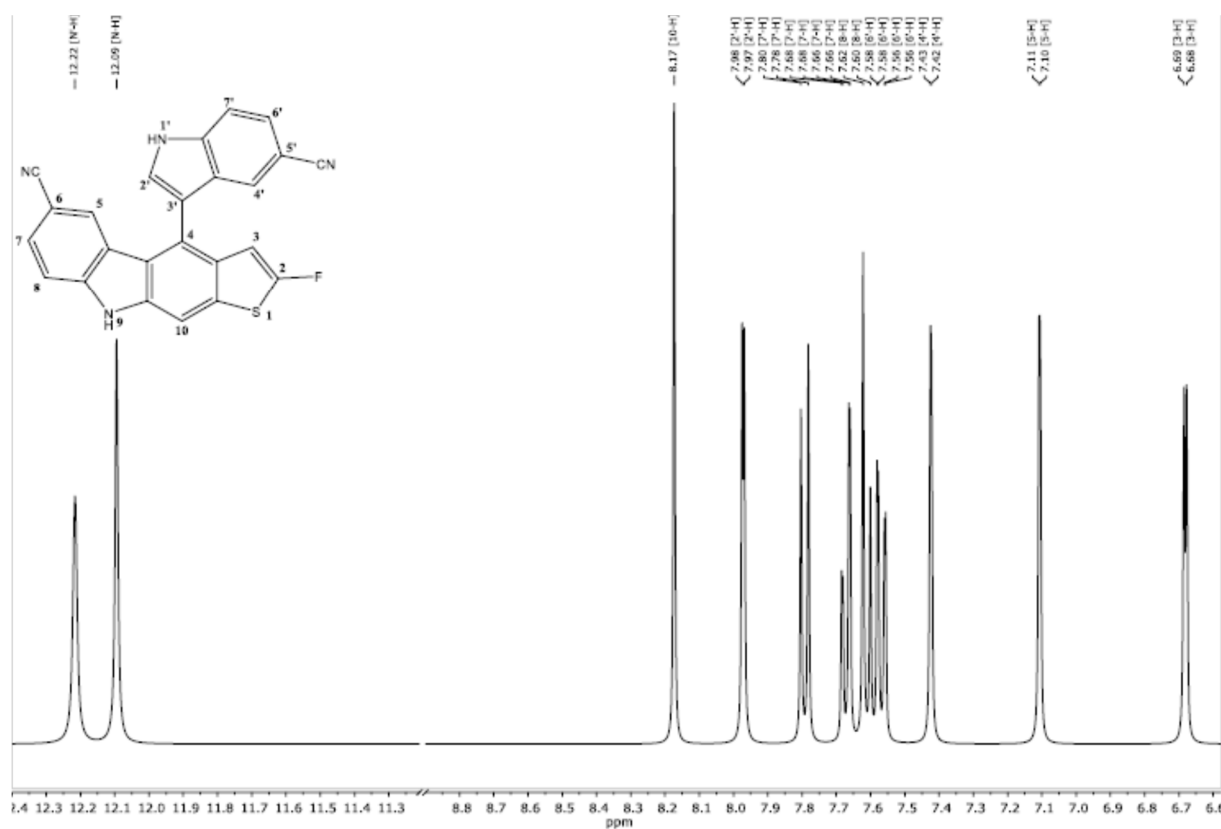

<sup>1</sup>H NMR spectrum of **3d**

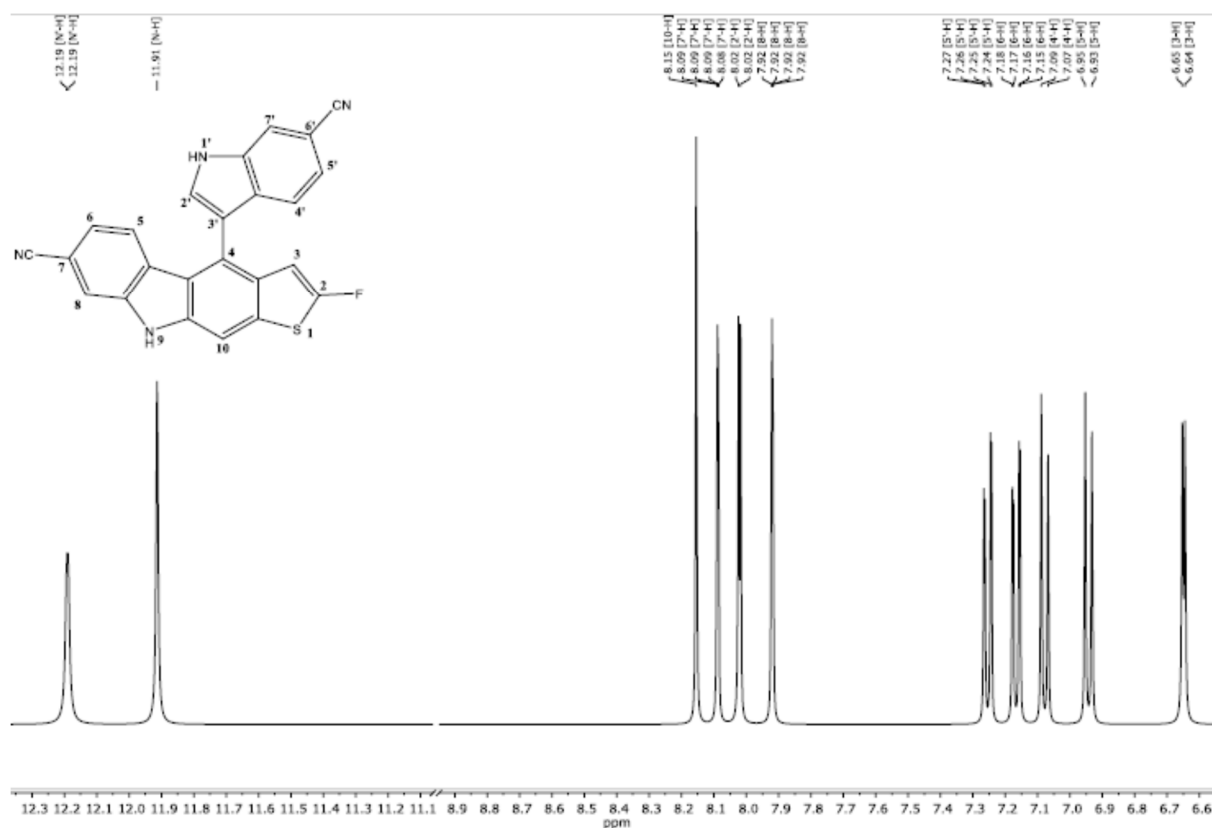

<sup>1</sup>H NMR spectrum of 3e

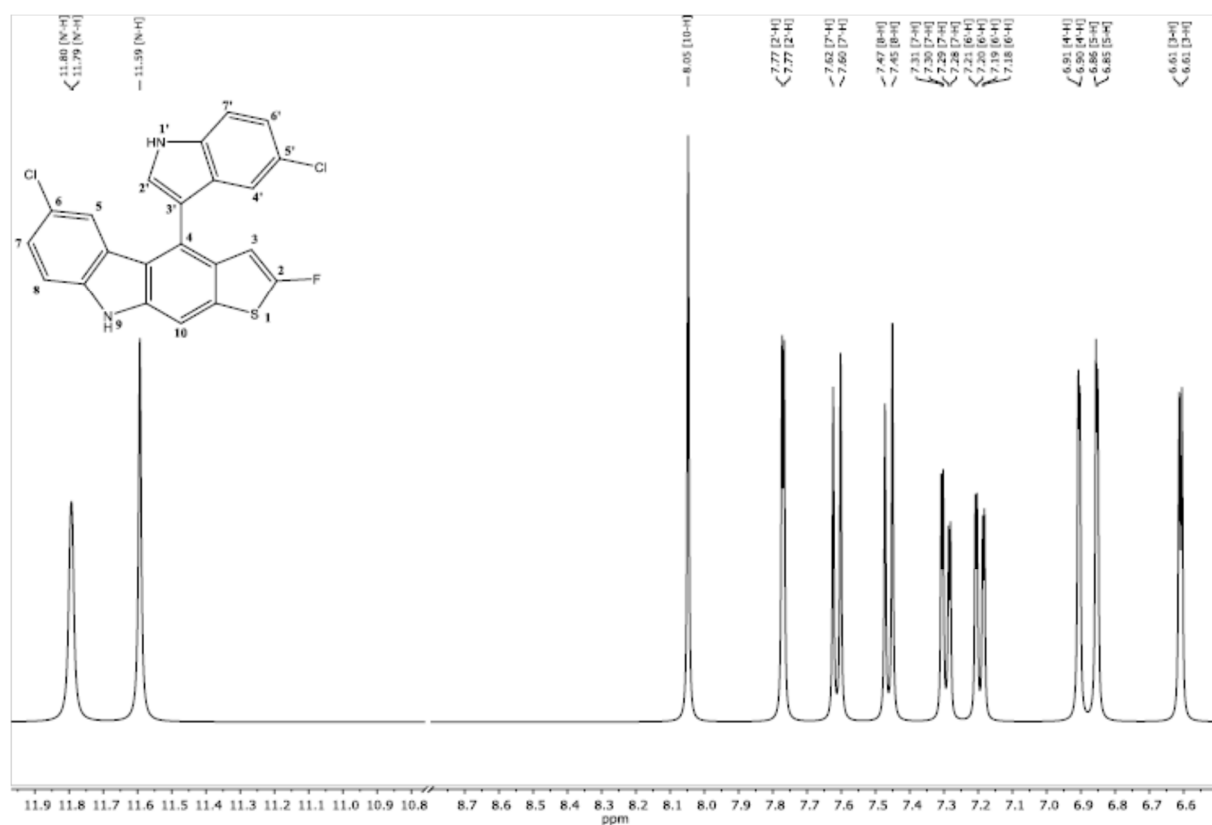

<sup>1</sup>H NMR spectrum of 3f

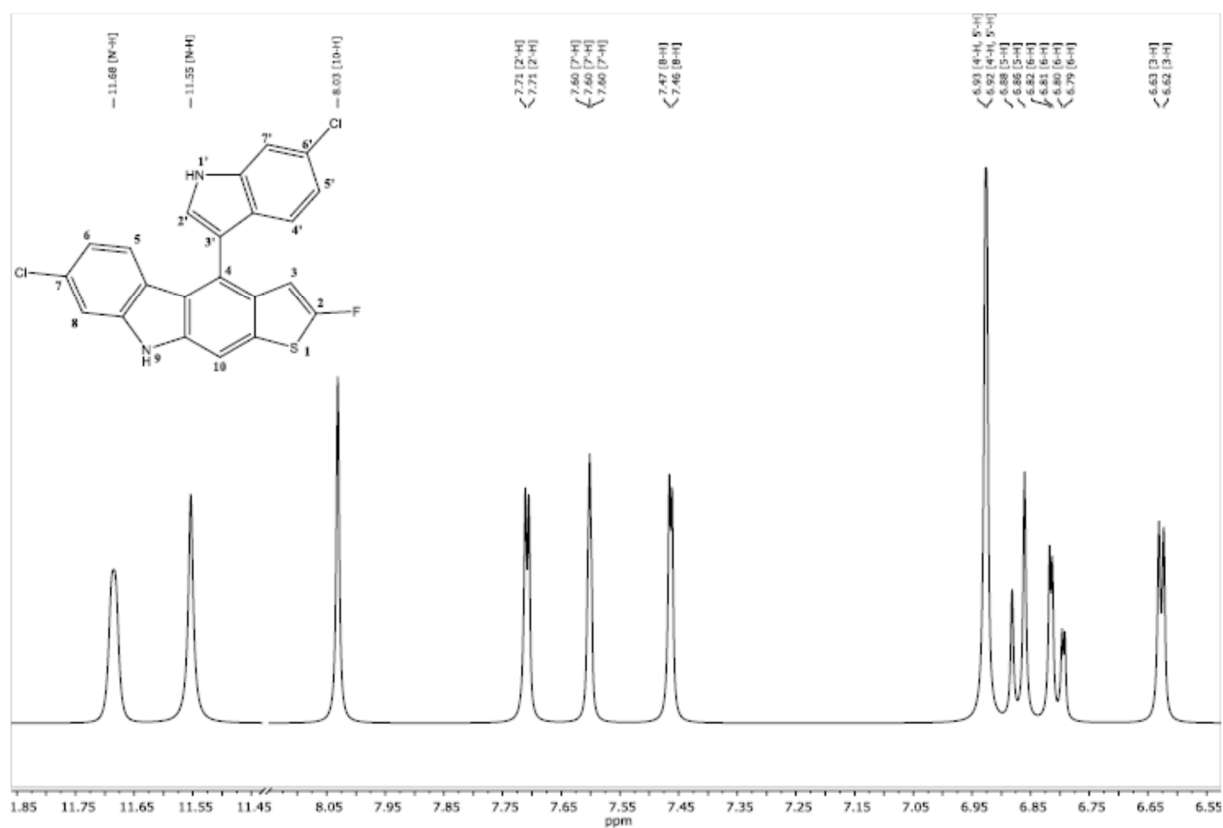

<sup>1</sup>H NMR spectrum of **3g**

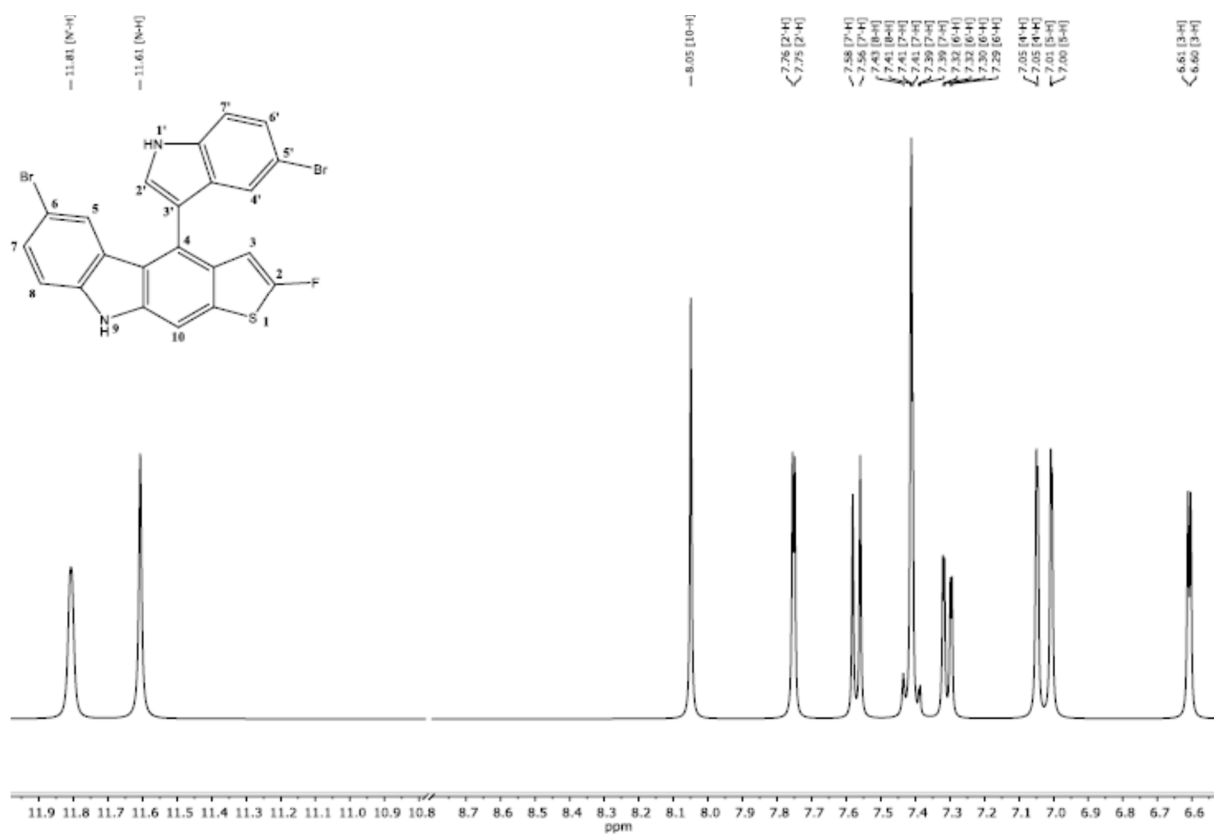

<sup>1</sup>H NMR spectrum of **3h**

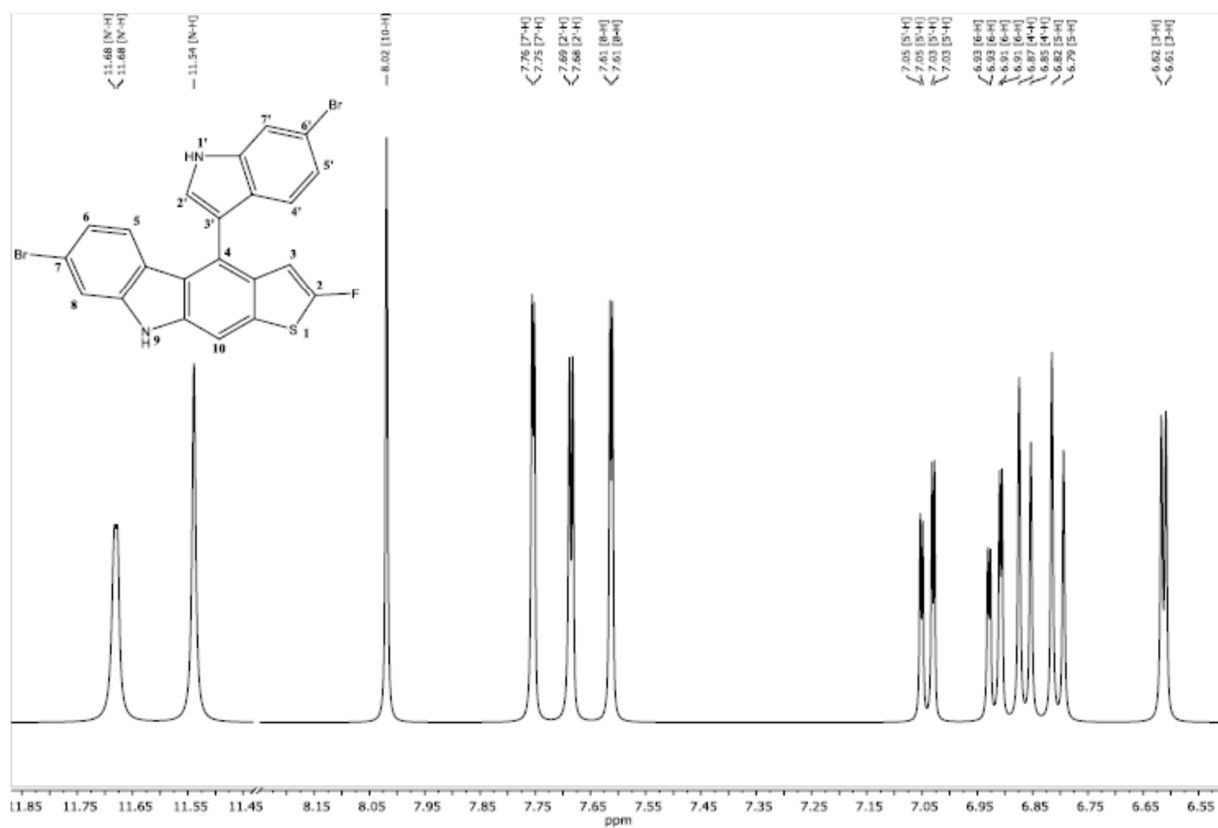<sup>1</sup>H NMR spectrum of **3i**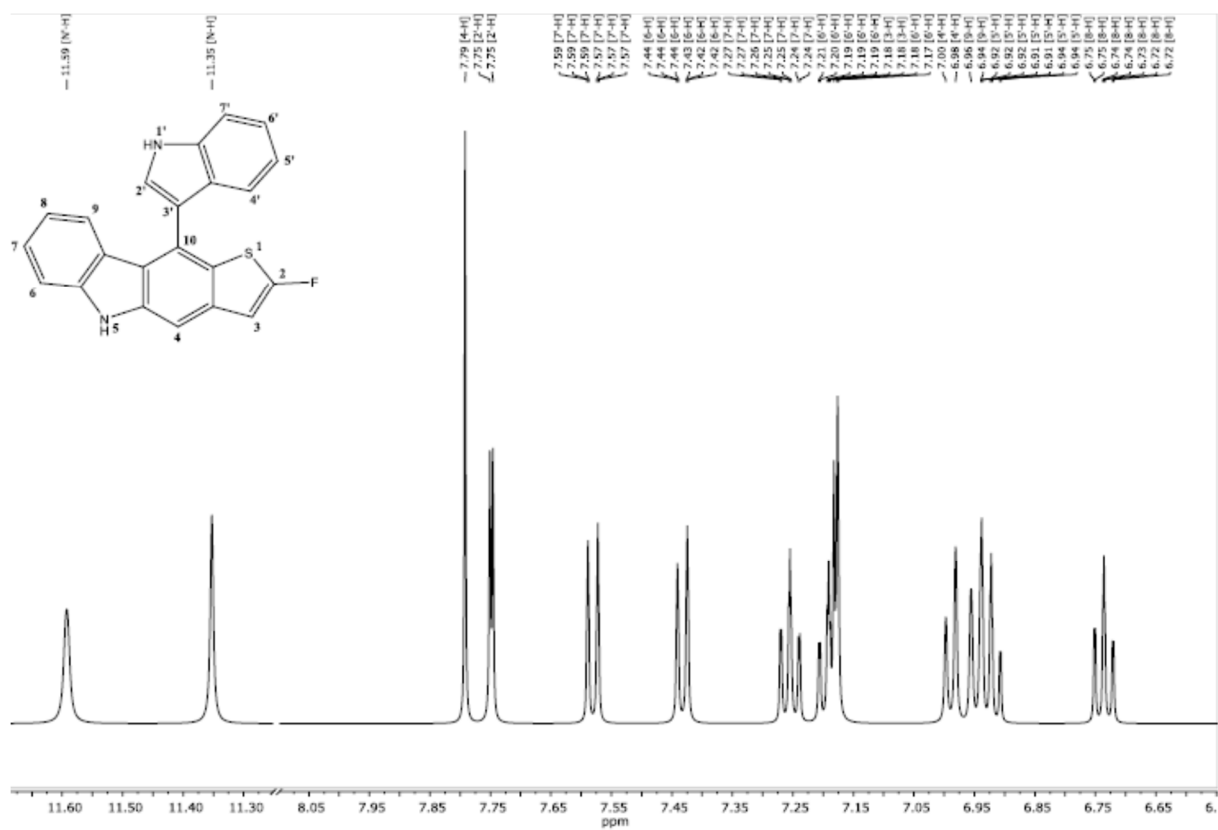<sup>1</sup>H NMR spectrum of **4a**

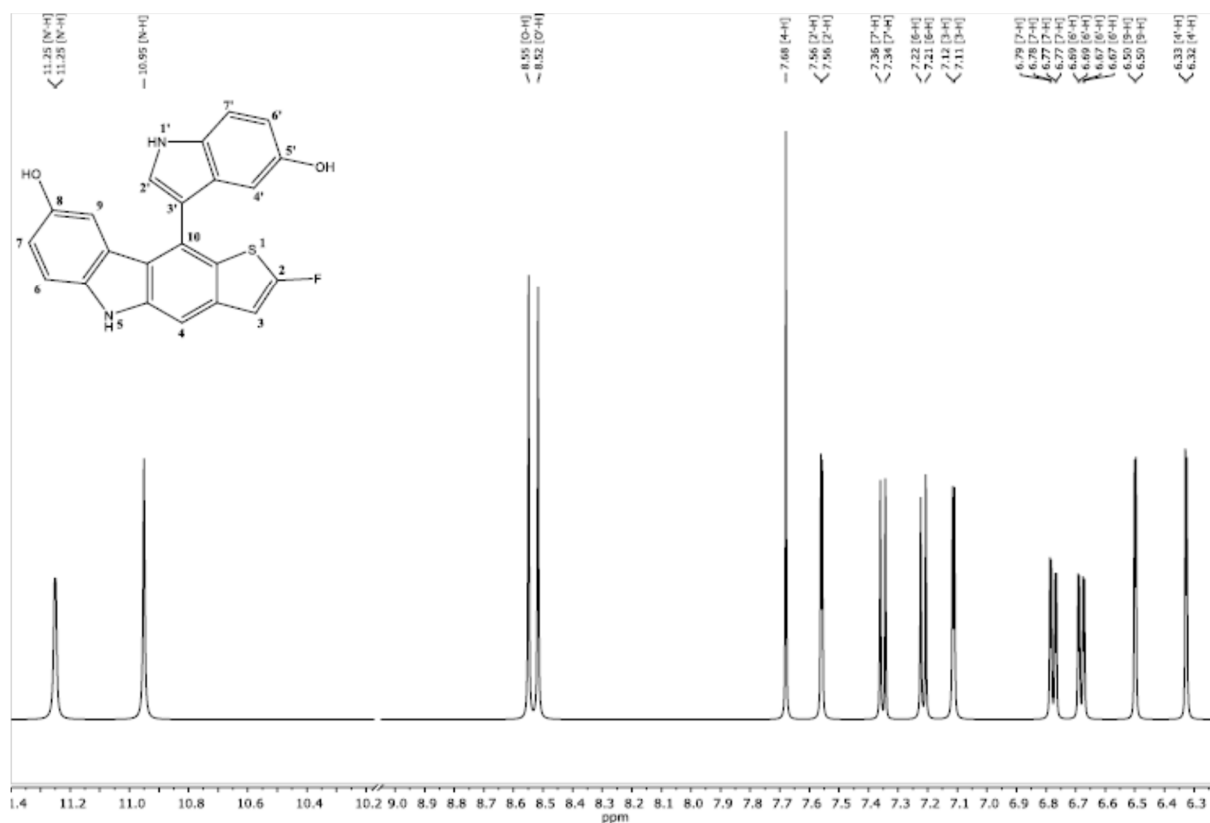

<sup>1</sup>H NMR spectrum of **4b**

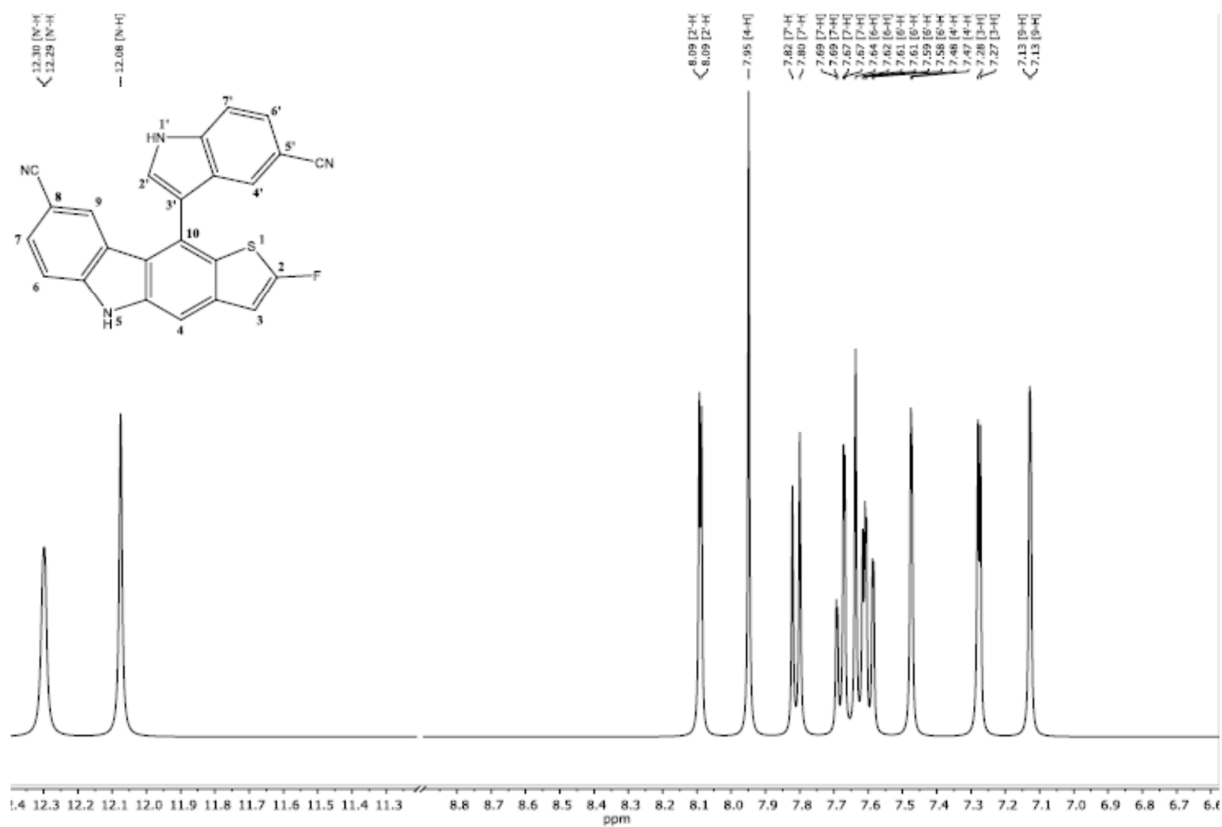

<sup>1</sup>H NMR spectrum of **4c**

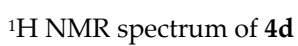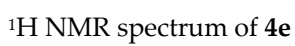



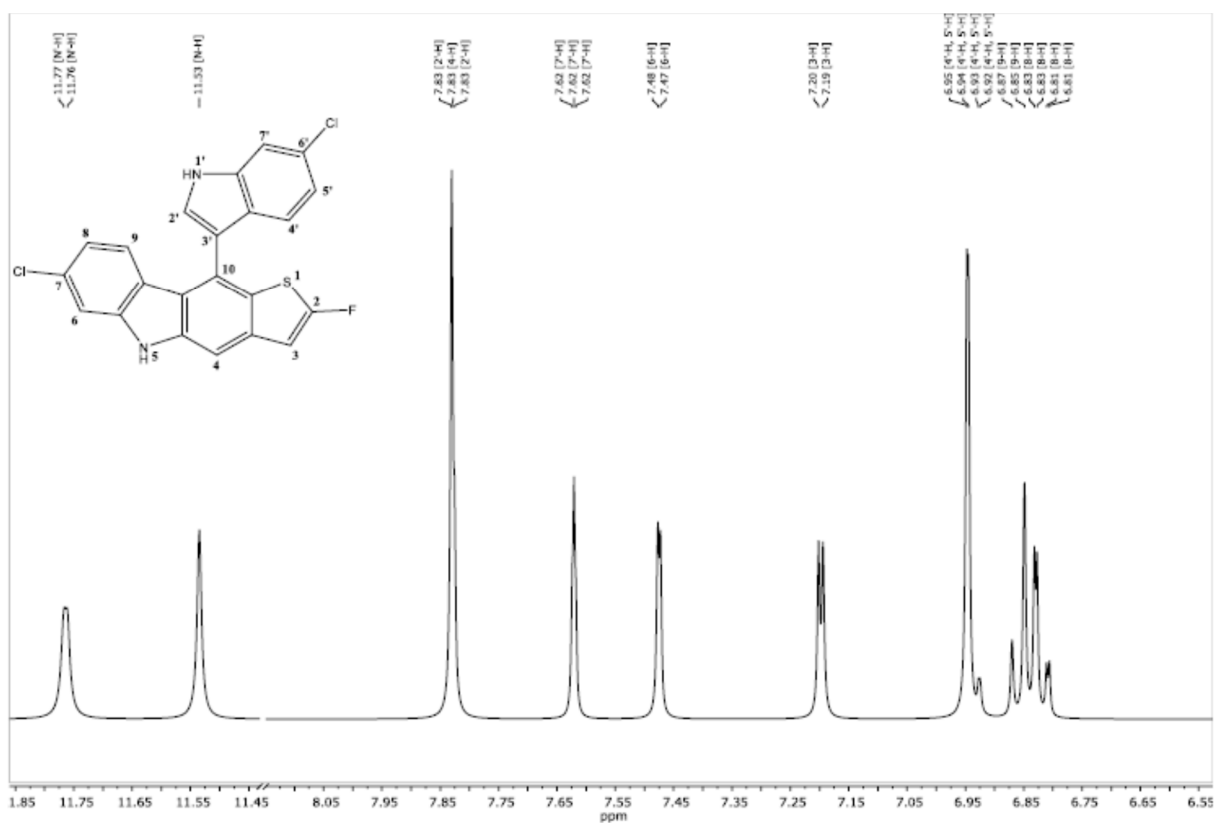

<sup>1</sup>H NMR spectrum of **4f**

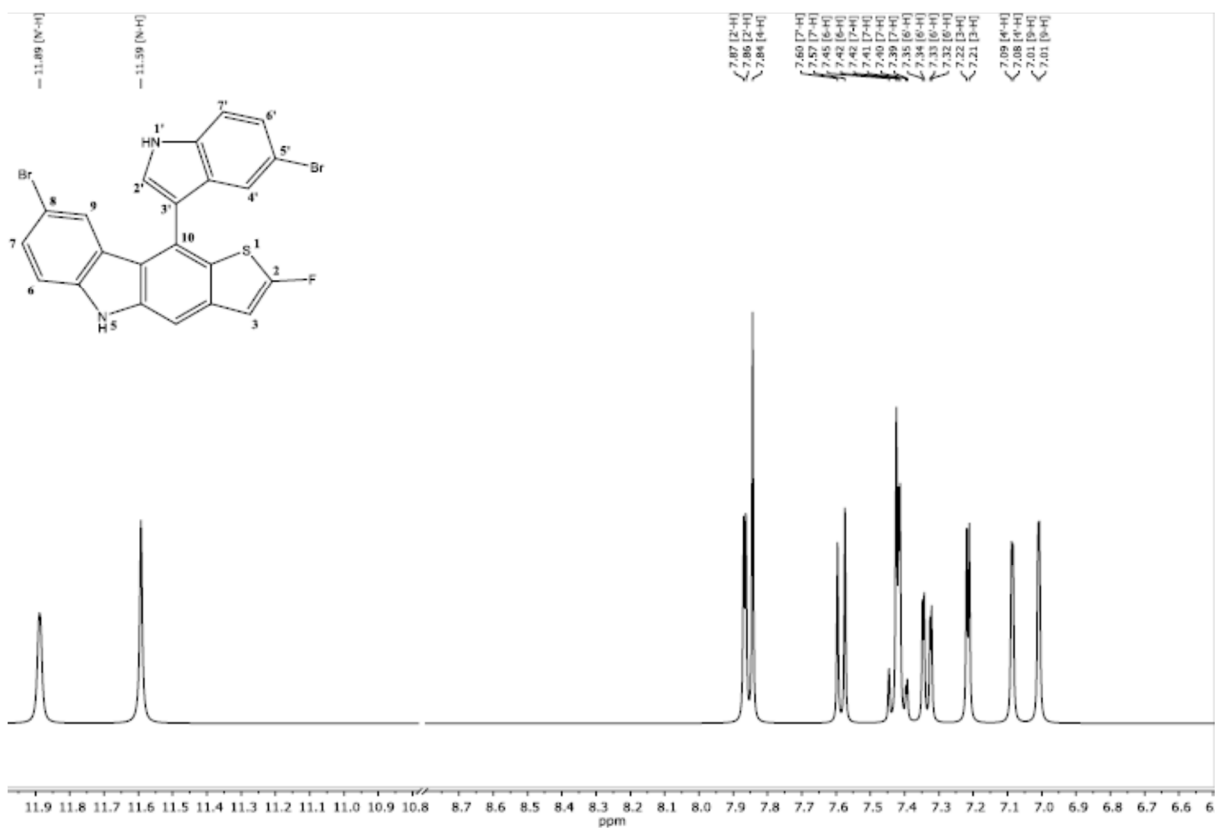

<sup>1</sup>H NMR spectrum of **4g**

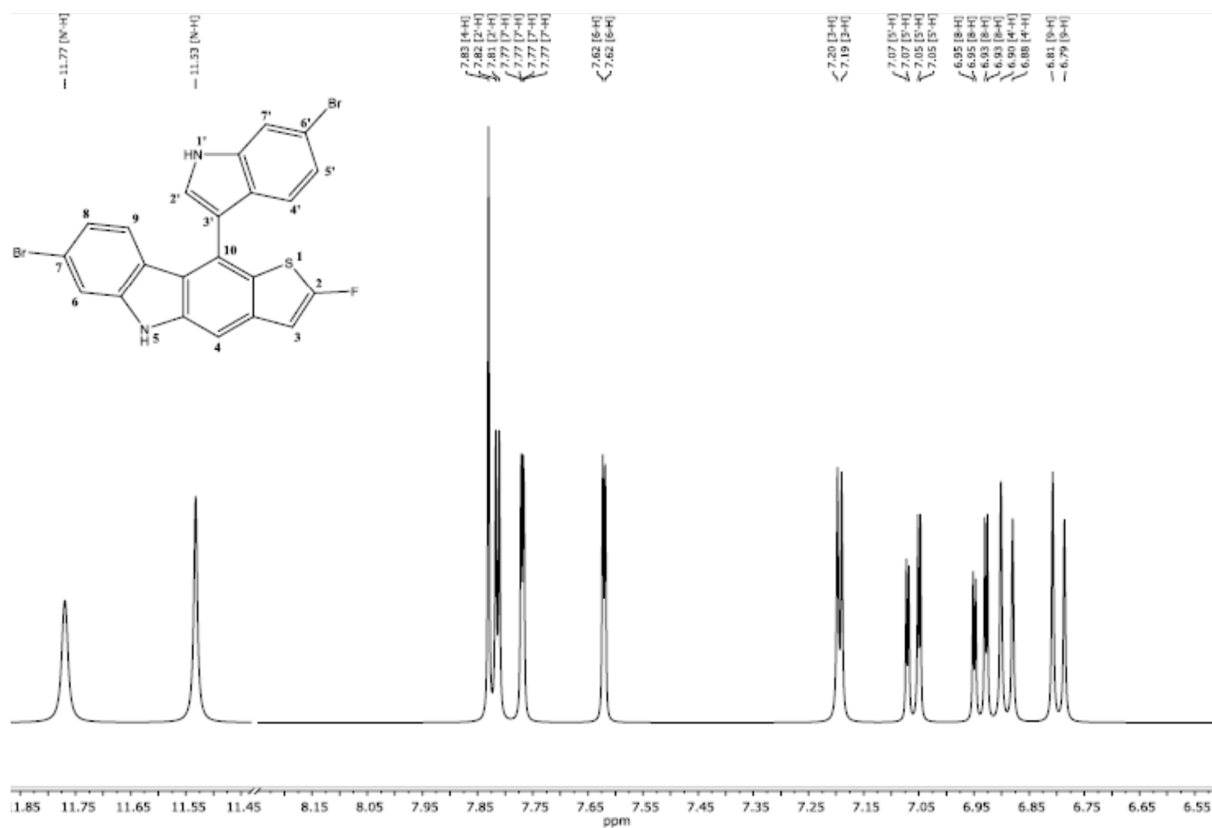

<sup>1</sup>H NMR spectrum of **4h**

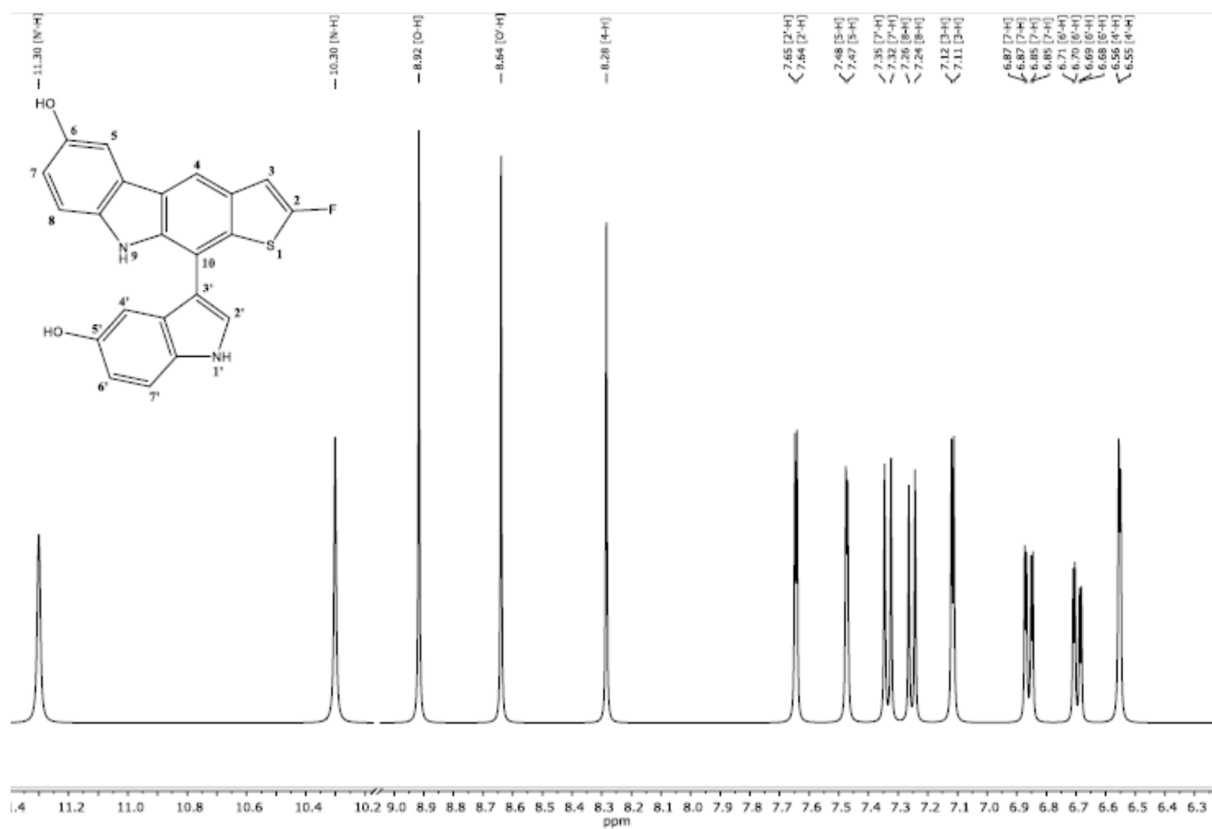

<sup>1</sup>H NMR spectrum of **5a**

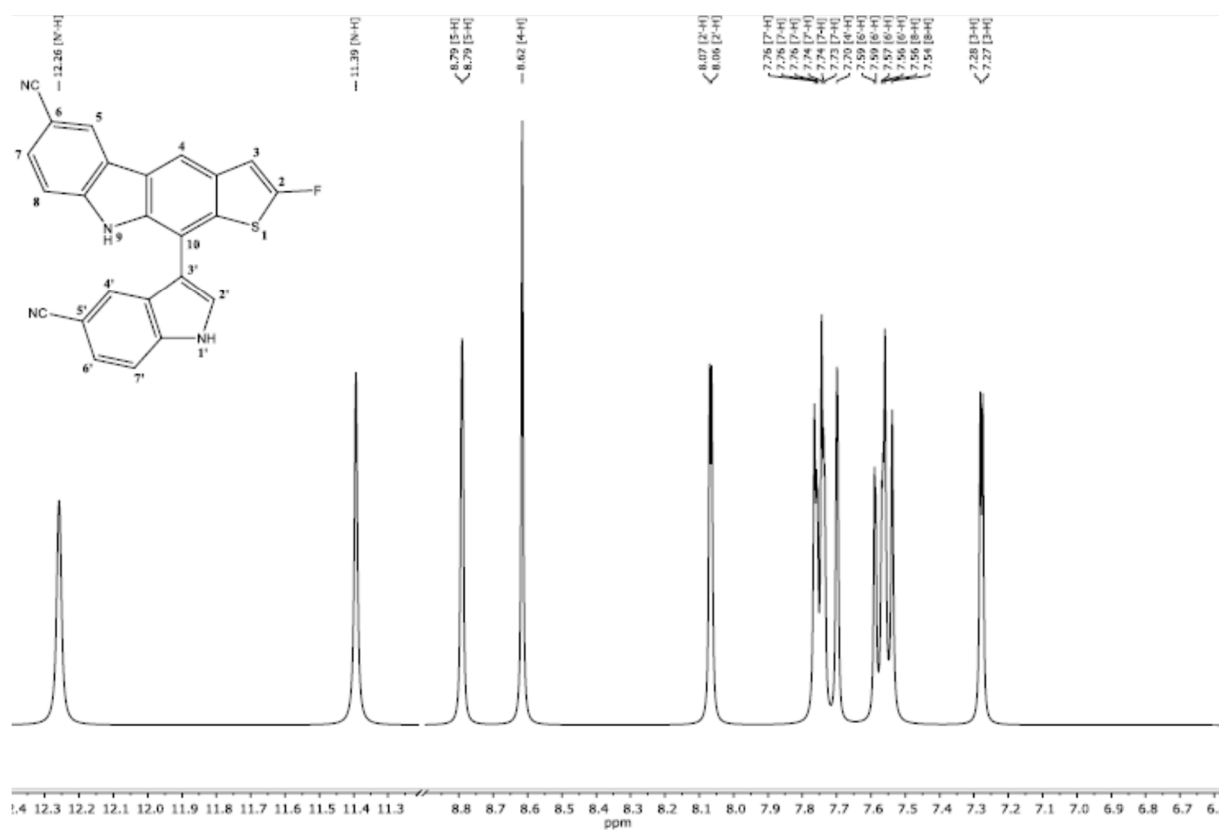

<sup>1</sup>H NMR spectrum of **5b**

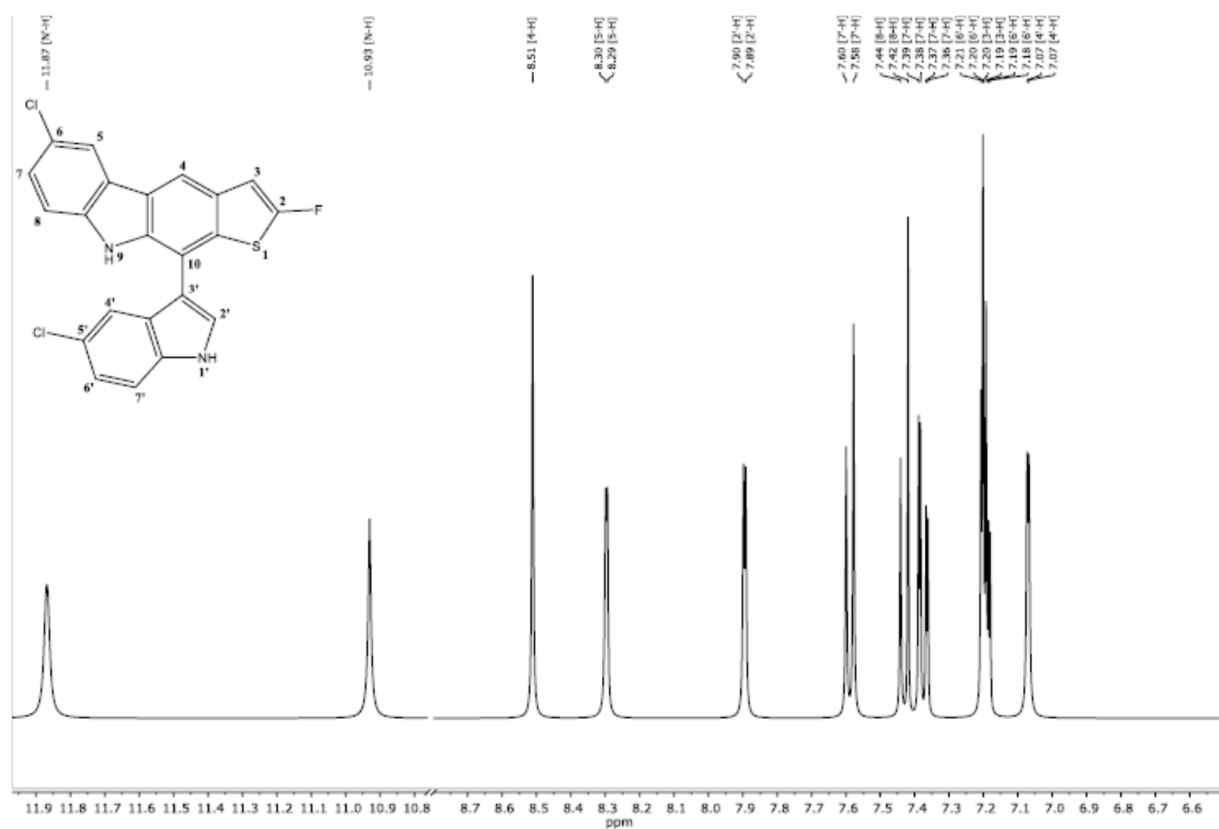

<sup>1</sup>H NMR spectrum of **5c**

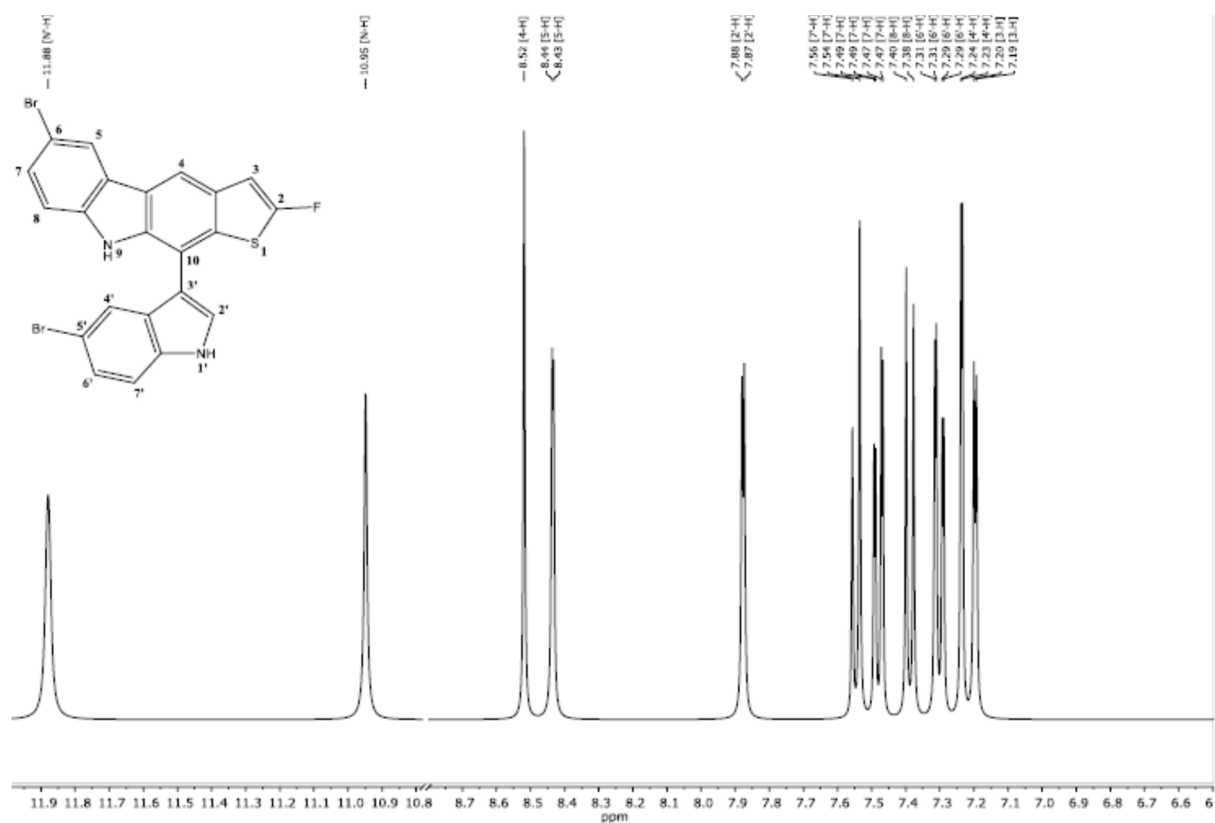

<sup>1</sup>H NMR spectrum of 5d

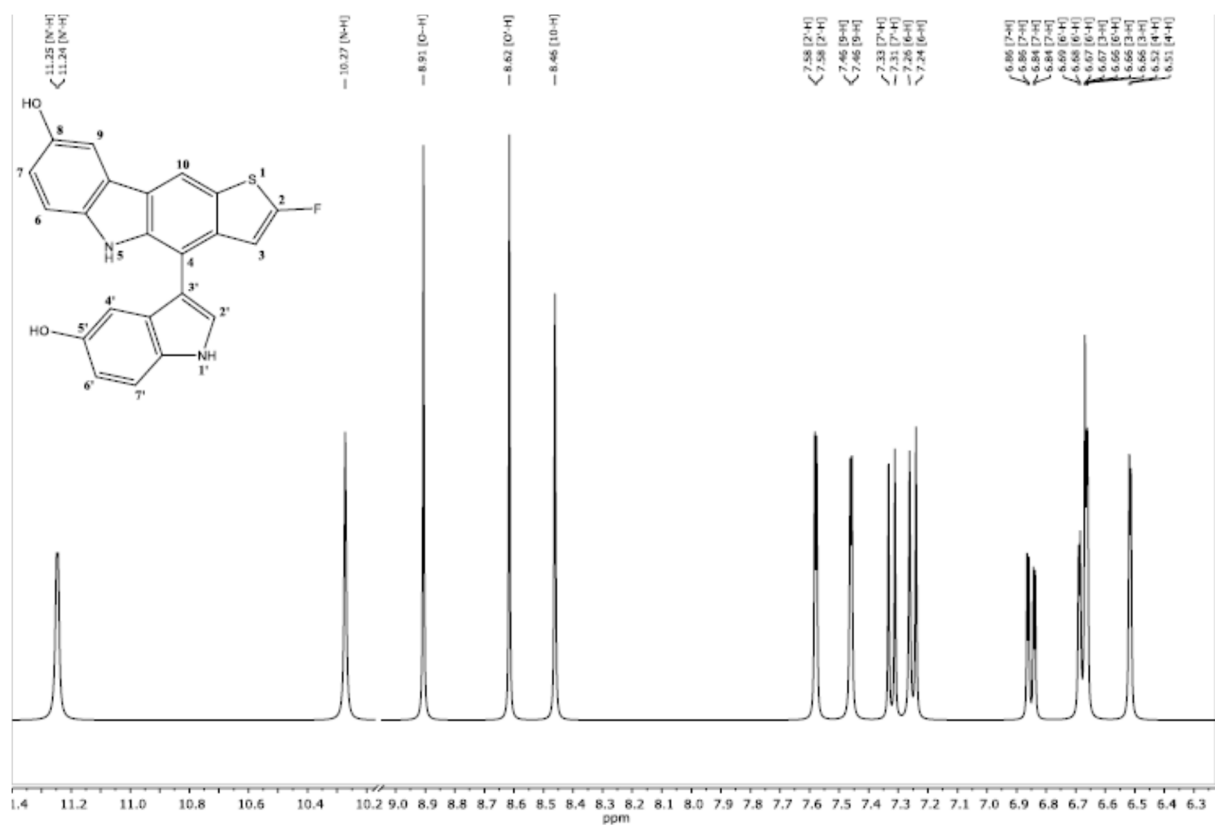

<sup>1</sup>H NMR spectrum of 6a

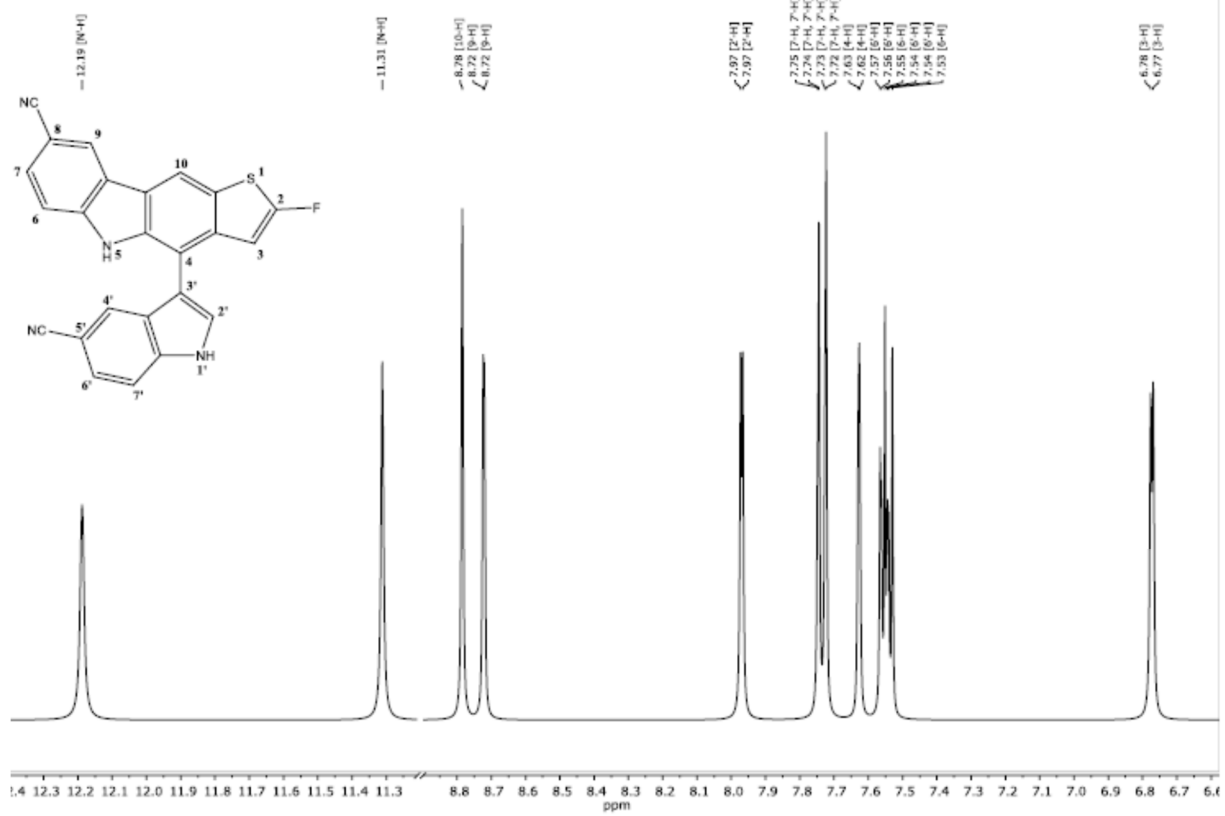<sup>1</sup>H NMR spectrum of **6b**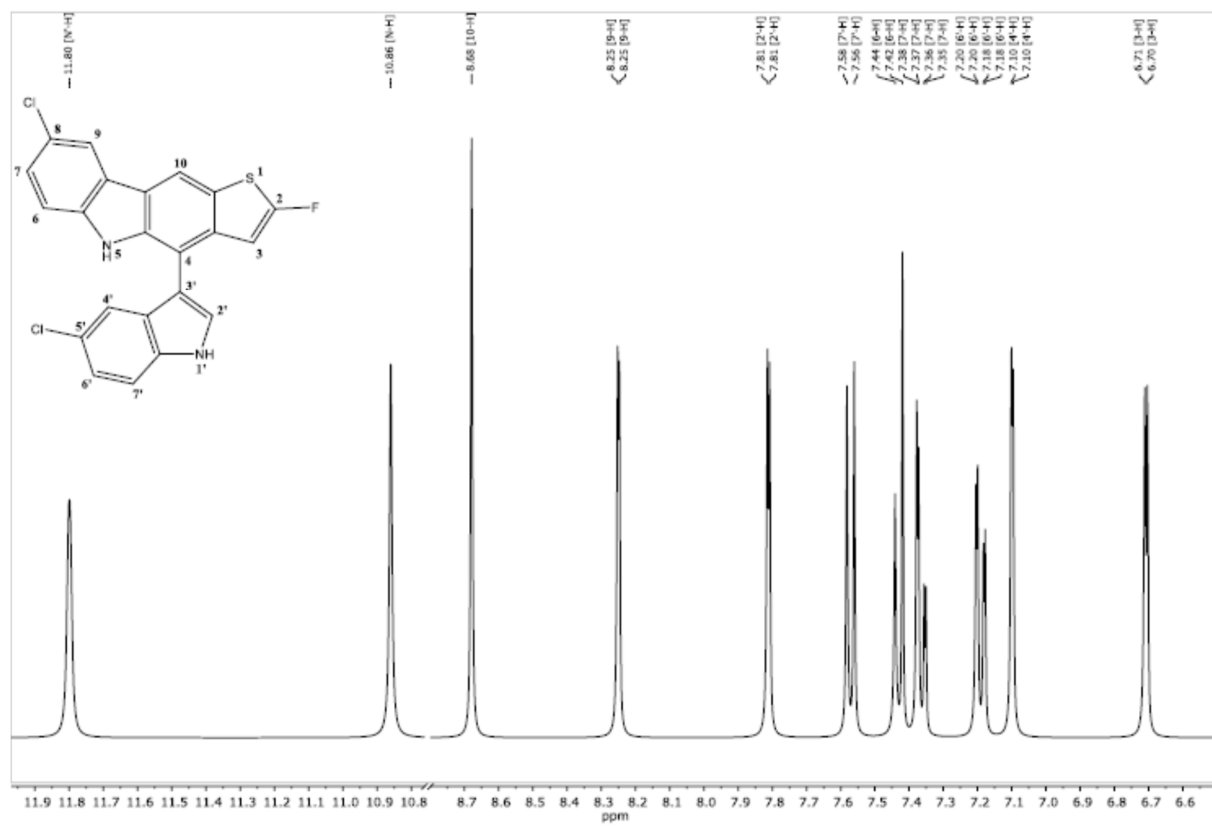<sup>1</sup>H NMR spectrum of **6c**

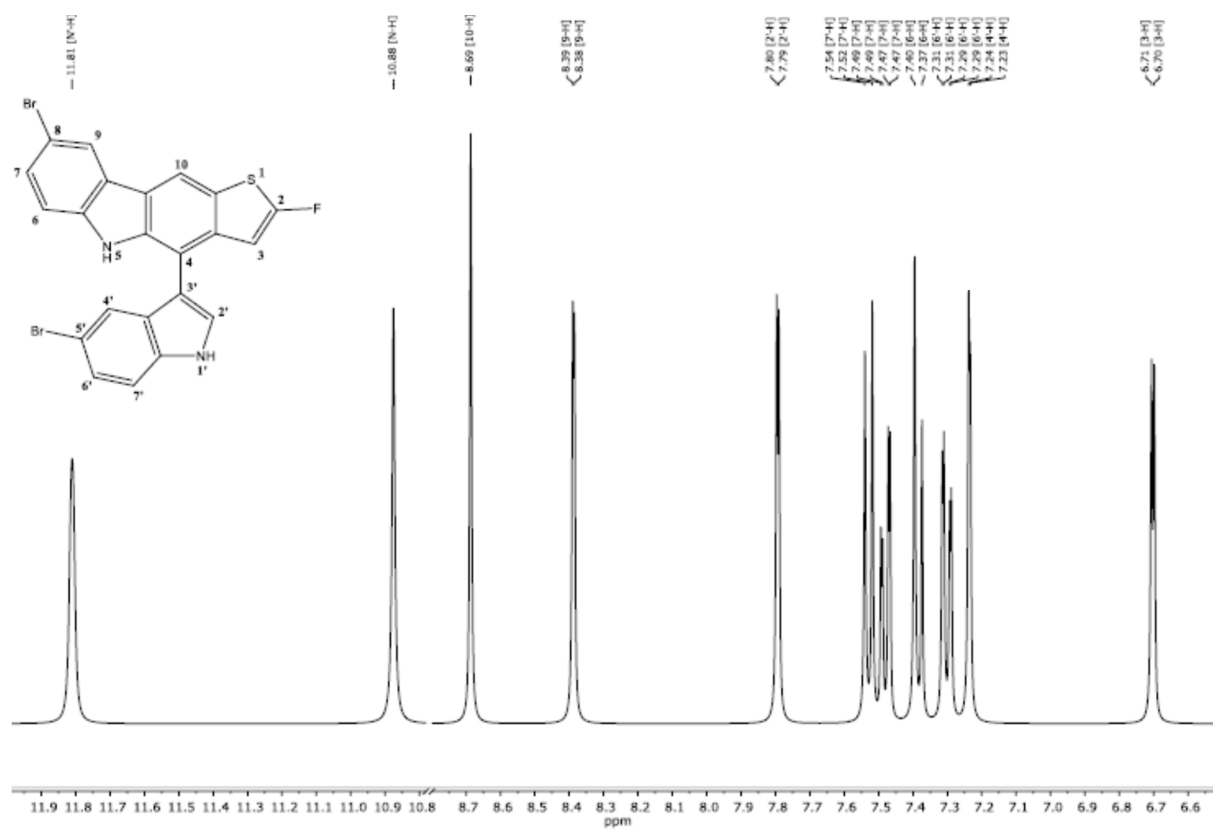

$^1\text{H}$  NMR spectrum of **6d**
